# Supplementary material
Source: PubMed Central journal article supplement (PMC7454781)
Supplement: supplementary_jph_skoda_et_al_fdaa124.pdf [file supplementary_jph_skoda_et_al_fdaa124.pdf]

## Supplemental Material

# Psychological burden of healthcare professionals in Germany during the acute phase of the COVID-19 pandemic: Differences and similarities in the international context.

**Tables: Comparisons of all scales across the four occupational groups, including 95% confidence intervals and Cohen's d.**

| Depression (PHQ-2)           |                 |                 |                 |           |                    |                    |
|------------------------------|-----------------|-----------------|-----------------|-----------|--------------------|--------------------|
| Contrast                     | Mean difference | 95% Lower limit | 95% Upper limit | Cohen's d | d: 95% Lower limit | d: 95% Upper limit |
| 1 Physician – others         | -0,543          | -0,714          | -0,373          | -0,377    | -0,468             | -0,287             |
| 2 Physician – Nursing staff  | -0,303          | -0,495          | -0,111          | -0,21     | -0,312             | -0,108             |
| 3 Physician – Paramedic      | -0,133          | -0,433          | 0,167           | -0,092    | -0,251             | 0,066              |
| 4 Others – Nursing staff     | 0,241           | 0,139           | 0,343           | 0,167     | 0,113              | 0,221              |
| 5 Others – Paramedics        | 0,41            | 0,159           | 0,662           | 0,285     | 0,152              | 0,418              |
| 6 Nursing staff – Paramedics | 0,169           | -0,097          | 0,436           | 0,118     | -0,023             | 0,259              |

Global group differences:  $\eta^2 = .009$ , 95%-CI [.0055 : .0118]

| Generalized anxiety (GAD-7)  |                 |                 |                 |           |                    |                    |
|------------------------------|-----------------|-----------------|-----------------|-----------|--------------------|--------------------|
| Contrast                     | Mean difference | 95% Lower limit | 95% Upper limit | Cohen's d | d: 95% Lower limit | d: 95% Upper limit |
| 1 Physician – others         | -1,609          | -2,168          | -1,051          | -0,342    | -0,432             | -0,251             |
| 2 Physician – Nursing staff  | -1,003          | -1,632          | -0,375          | -0,213    | -0,315             | -0,111             |
| 3 Physician – Paramedic      | 0,696           | -0,285          | 1,676           | 0,148     | -0,011             | 0,306              |
| 4 Others – Nursing staff     | 0,606           | 0,273           | 0,939           | 0,129     | 0,075              | 0,182              |
| 5 Others – Paramedics        | 2,305           | 1,482           | 3,128           | 0,489     | 0,356              | 0,623              |
| 6 Nursing staff – Paramedics | 1,699           | 0,827           | 2,571           | 0,361     | 0,219              | 0,502              |

Global group differences  $\eta^2 = .009$ , 95%-CI [.0059 : .0125]

**Health status**

| Contrast                     | Mean difference | 95% Lower limit | 95% Upper limit | Cohen's d | d: 95% Lower limit | d: 95% Upper limit |
|------------------------------|-----------------|-----------------|-----------------|-----------|--------------------|--------------------|
| 1 Physician – others         | 6,114           | 4,010           | 8,214           | 0,345     | 0,254              | 0,435              |
| 2 Physician – Nursing staff  | 4,072           | 1,710           | 6,436           | 0,23      | 0,128              | 0,332              |
| 3 Physician – Paramedic      | 0,987           | -2,700          | 4,674           | 0,056     | -0,103             | 0,214              |
| 4 Others – Nursing staff     | -2,042          | -3,290          | -0,790          | -0,115    | -0,169             | -0,061             |
| 5 Others – Paramedics        | -5,127          | -8,220          | -2,032          | -0,289    | -0,423             | -0,156             |
| 6 Nursing staff – Paramedics | -3,085          | -6,360          | 0,195           | -0,174    | -0,315             | -0,033             |

Global group differences:  $\eta^2 = .007$ , 95%-CI [.00039 : .0094]

**COVID-19 related anxiety**

| Contrast                     | Mean difference | 95% Lower limit | 95% Upper limit | Cohen's d | d: 95% Lower limit | d: 95% Upper limit |
|------------------------------|-----------------|-----------------|-----------------|-----------|--------------------|--------------------|
| 1 Physician – others         | -0,356          | -0,562          | -0,150          | -0,205    | -0,295             | -0,114             |
| 2 Physician – Nursing staff  | -0,005          | -0,237          | 0,227           | -0,003    | -0,105             | 0,099              |
| 3 Physician – Paramedic      | 0,720           | 0,358           | 1,082           | 0,414     | 0,255              | 0,573              |
| 4 Others – Nursing staff     | 0,351           | 0,228           | 0,473           | 0,202     | 0,148              | 0,256              |
| 5 Others – Paramedics        | 1,076           | 0,772           | 1,390           | 0,619     | 0,485              | 0,752              |
| 6 Nursing staff – Paramedics | 0,725           | 0,404           | 1,047           | 0,417     | 0,276              | 0,558              |

Global group differences:  $\eta^2 = .01$ , 95%-CI [.0076 : .0148]

**Subjective level of information regarding COVID-19**

| Contrast                     | Mean difference | 95% Lower limit | 95% Upper limit | Cohen's d | d: 95% Lower limit | d: 95% Upper limit |
|------------------------------|-----------------|-----------------|-----------------|-----------|--------------------|--------------------|
| 1 Physician – others         | 0,067           | -0,049          | 0,183           | 0,024     | -0,029             | 0,077              |
| 2 Physician – Nursing staff  | 0,164           | 0,033           | 0,295           | 0,07      | 0,011              | 0,129              |
| 3 Physician – Paramedic      | 0,137           | -0,067          | 0,341           | 0,028     | -0,063             | 0,119              |
| 4 Others – Nursing staff     | 0,097           | 0,028           | 0,166           | 0,046     | 0,015              | 0,077              |
| 5 Others – Paramedics        | 0,070           | -0,101          | 0,242           | 0,004     | -0,072             | 0,08               |
| 6 Nursing staff – Paramedics | -0,027          | -0,208          | 0,155           | -0,042    | -0,122             | 0,039              |

Global group differences:  $\eta^2 = .001$ , 95%-CI [.00024 : .00267]

|                                                   |                      | <i>Depression (PHQ-2)</i> | <i>Generalized Anxiety (GAD-7)</i> | <i>Health status</i> | <i>Fear of COVID-19</i> | <i>Subj. Level of information</i> |
|---------------------------------------------------|----------------------|---------------------------|------------------------------------|----------------------|-------------------------|-----------------------------------|
| Depression (PHQ-2)                                | <i>r<sub>s</sub></i> | 1                         | 0.58                               | -0.28                | 0.19                    | -0.13                             |
|                                                   | CI                   |                           | 0,548 : 0,611                      | -0,326 : -0,233      | 0,149 : 0,230           | -0,186 : -0,085                   |
| Generalized Anxiety (GAD-7)                       | <i>r<sub>s</sub></i> |                           | 1                                  | -0.3                 | 0.42                    | -0.15                             |
|                                                   | CI                   |                           |                                    | -0,344 : -0,263      | 0,368 : 0,449           | -0,199 : -0,099                   |
| Health Status                                     | <i>r<sub>s</sub></i> |                           |                                    | 1                    | -0.14                   | 0.1                               |
|                                                   | CI                   |                           |                                    |                      | -0,172 : -0,084         | 0,047 : 0,135                     |
| Fear of COVID-19                                  | <i>r<sub>s</sub></i> |                           |                                    |                      | 1                       | -0.08                             |
|                                                   | CI                   |                           |                                    |                      |                         | -0,123 : -0,039                   |
| Subjective level of information ( $\alpha = .8$ ) | <i>r<sub>s</sub></i> |                           |                                    |                      |                         | 1                                 |
|                                                   | CI                   |                           |                                    |                      |                         |                                   |

Supplemental Table 10. Correlations between the applied measures. Cronbach's  $\alpha$  for self-generated scales is shown in the left column.
